# Supplementary material for: A fungal pathogen deploys a small silencing RNA that attenuates mosquito immunity and facilitates infection
Source: PubMed Central journal article supplement (PMC6754459; doi:10.1038/s41467-019-12323-1), 2019-09-20
Supplement: 41467_2019_12323_MOESM1_ESM.pdf [file 41467_2019_12323_MOESM1_ESM.pdf]

# **Supplementary Information**

## **A fungal pathogen deploys a small silencing RNA that attenuates mosquito immunity and facilitates infection**

Chunlai Cui, Yan Wang, Jingnan Liu, Jing Zhao, Peilu Sun, Sibao Wang

Corresponding authors: Wang, S. (sbwang@sibs.ac.cn)

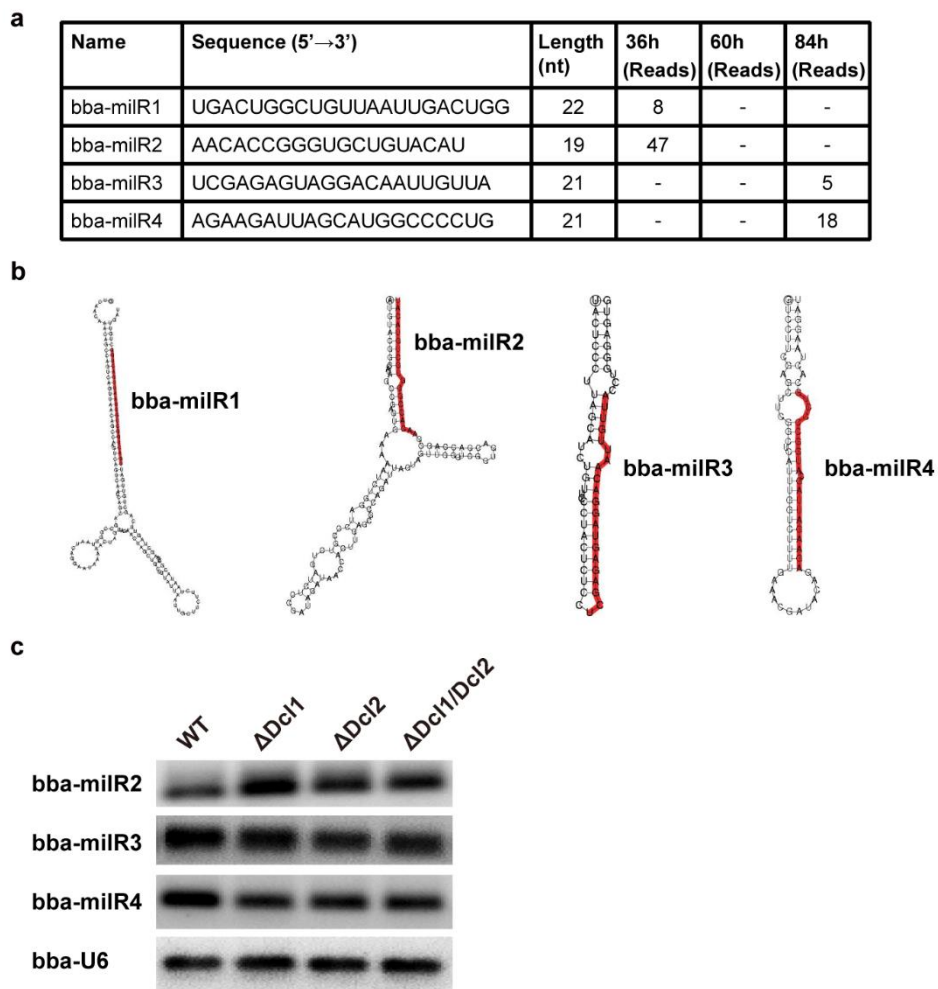

## Supplementary Figure 1

### Sequences and predicted secondary structures of *Beauveria bassiana* miRNA-like RNAs (miRNAs).

(a) Sequences, length and reads of four miRNAs identified in sRNA libraries from *B. bassiana*-infected mosquitoes. (b) Predicted secondary structure of the bba-miR1, bba-miR2, bba-miR3 and bba-miR4 precursors (pre-miRNAs). The mature miRNAs are highlighted in red. (c) bba-miR2, bba-miR3 and bba-miR4 can be detected in WT, *Dicer1* deletion mutant ( $\Delta Dcl1$ ), *Dicer2* deletion mutant ( $\Delta Dcl2$ ) and *Dicer1/Dicer2* double mutant ( $\Delta Dcl1/Dcl2$ ). Source data are provided as a Source Data file.

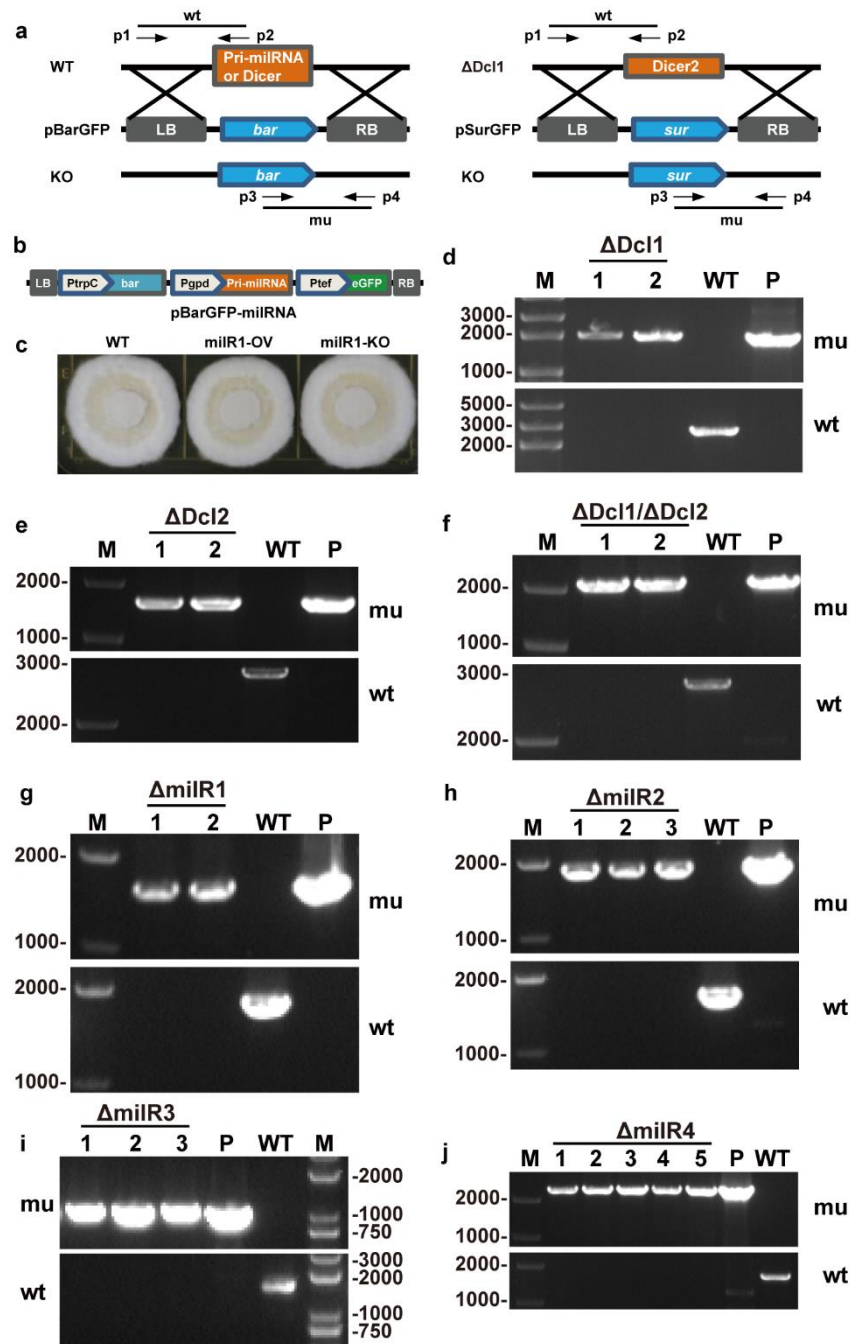

## Supplementary Figure 2

### Knockout or over-expression of milRNA genes and *Dicer* in *B. bassiana* RESEF252.

(a) Schematic diagram of the milRNA gene or *Dicer* wild type locus and the plasmids pBar-GFP and pSur-GFP containing flanking regions of the pre-miRNA or *Dicer*, which were used for milRNA genes or *Dicer* disruption through double crossover recombination. LB, left border; RB,

right border; bar, the Ignite/basta-resistance (bar) gene; sur, the sulfonyleurea resistance (sur) gene. Primer pairs p1 and p2 were used to amplify WT genome DNA fragment, p3 and p4 were used to verify knock-out mutants. (b) Schematic diagram of the vector pBarGFP-miRNA that was used for miRNAs overexpression (OV). P<sub>gpd</sub>, *Aspergillus nidulans gpdA* promoter; P<sub>trpC</sub>, *A. nidulans trpC* terminator; P<sub>tef</sub>, *Trichoderma reesei* translation elongation factor 1 alpha gene promoter. (c) Growth and conidia production of milR1-OV and milR1-KO are similar to wild-type strain (WT). Verification of  $\Delta Dcl1$  (d),  $\Delta Dcl2$  (e),  $\Delta Dcl1/\Delta Dcl2$  (f),  $\Delta milR1$  (g),  $\Delta milR2$  (h),  $\Delta milR3$  (i) and  $\Delta milR4$  (j) mutant strains by PCR using two relevant primer pairs of p1 and p2, p3 and p4.  $\Delta Dcl1/\Delta Dcl2$  double mutants were generated by disrupting *Dcl2* in a *Dcl1* mutant strain, and verified by PCR detecting *Dcl2* gene in the putative transformants using the two relevant primer pairs of p1 and p2, p3 and p4 (see right diagram of the panel a). The plasmid pBar-GFP or pSur-GFP was used as a positive control. Source data are provided as a Source Data file.

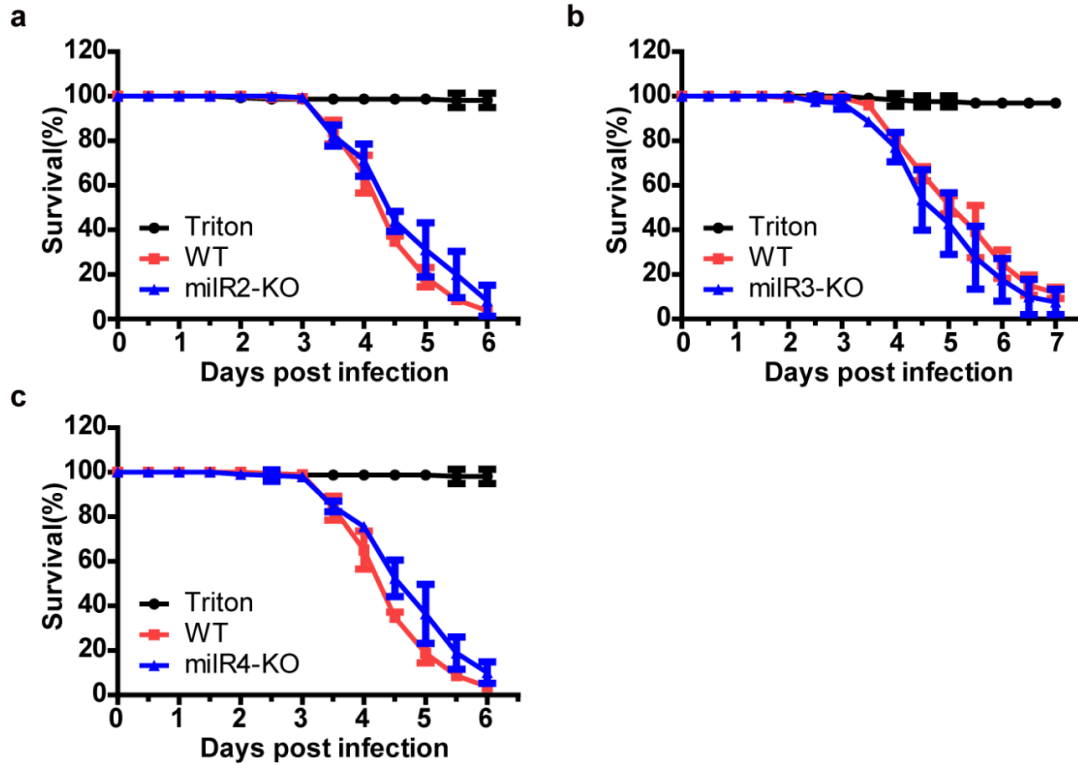

### Supplementary Figure 3

Survival of adult female *A. stephensi* mosquitoes after topical infection with suspension of  $10^8$  conidia/ml of wild type strain ARSEF252 (WT), Knockout strains bba-milR2-KO (a), milR3-KO (b) and milR4-KO (c). Survival percentages are means of three biological replicates of 50 mosquitoes each (mean  $\pm$  s.e.m). The statistical significance of survival curves was analyzed with the log-rank (Mantel-Cox) test. There is no significant difference in the virulence between WT and milR2-KO, milR3-KO or milR4-KO to the mosquitoes. The experiment was repeated three times with similar results. Source data are provided as a Source Data file.

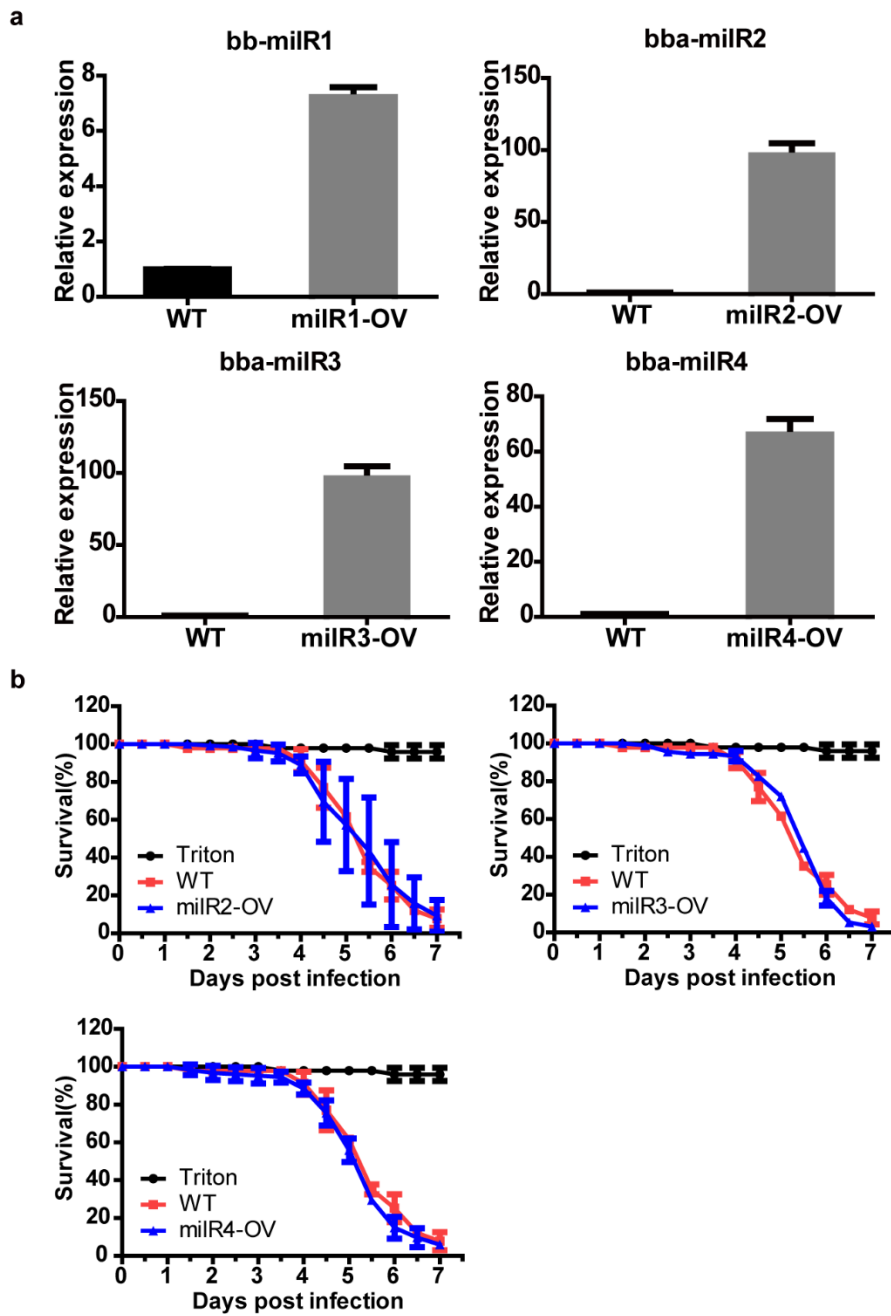

**Supplementary Figure 4**

**Effect of overexpression of bba-miR2, bba-miR3 and bba-miR4 on fungal virulence to adult female *A. stephensi* mosquitoes.**

(a) Analysis of expression of bba-milR1, bba-milR2, bba-milR3 and bba-milR4 relative to U6 in *B. bassiana* ARSEF252 and overexpression strains, as determined by qPCR. The expression values are normalized to WT. (b) Survival curves of female mosquitoes following topical inoculation with suspension of  $10^7$  conidia/ml of the wild-type and milR2-OV, milR3-OV and milR4-OV strains. Survival percentages are means of three biological replicates of 50 mosquitoes each (mean  $\pm$  s.e.m). The statistical significance of survival curves was analyzed with the log-rank (Mantel-Cox) test. There is no significant difference in the virulence between WT and milR2-OV, milR3-OV or milR4-OV against the mosquitoes. Similar results were obtained in three biological repeats. Source data are provided as a Source Data file.

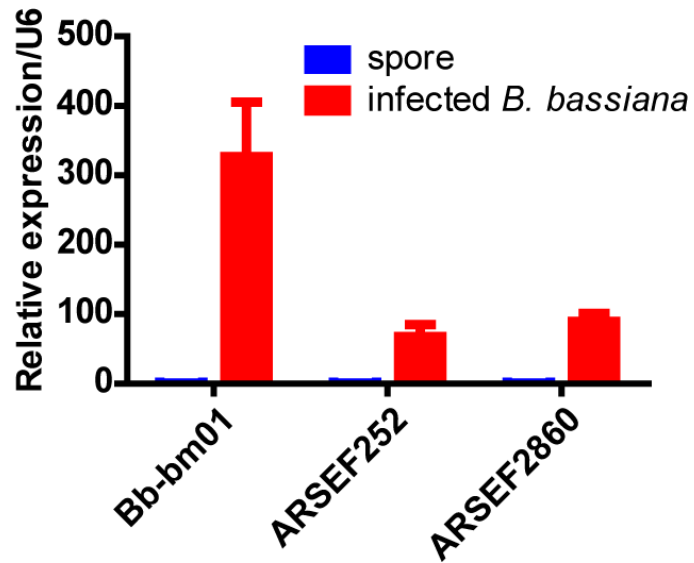

**Supplementary Figure 5**

**bba-milR1 is expressed at 36 h after infection of *A. stephensi* mosquitoes with the *B. bassiana* strains Bb-bm01, ARSEF252 and ARSEF2860.** The *B. bassiana* U6 small nuclear RNA (U6) was used as an internal reference in qRT-PCR assays. The expression values are normalized to spore. The experiment was repeated three times with similar results. Source data are provided as a Source Data file.



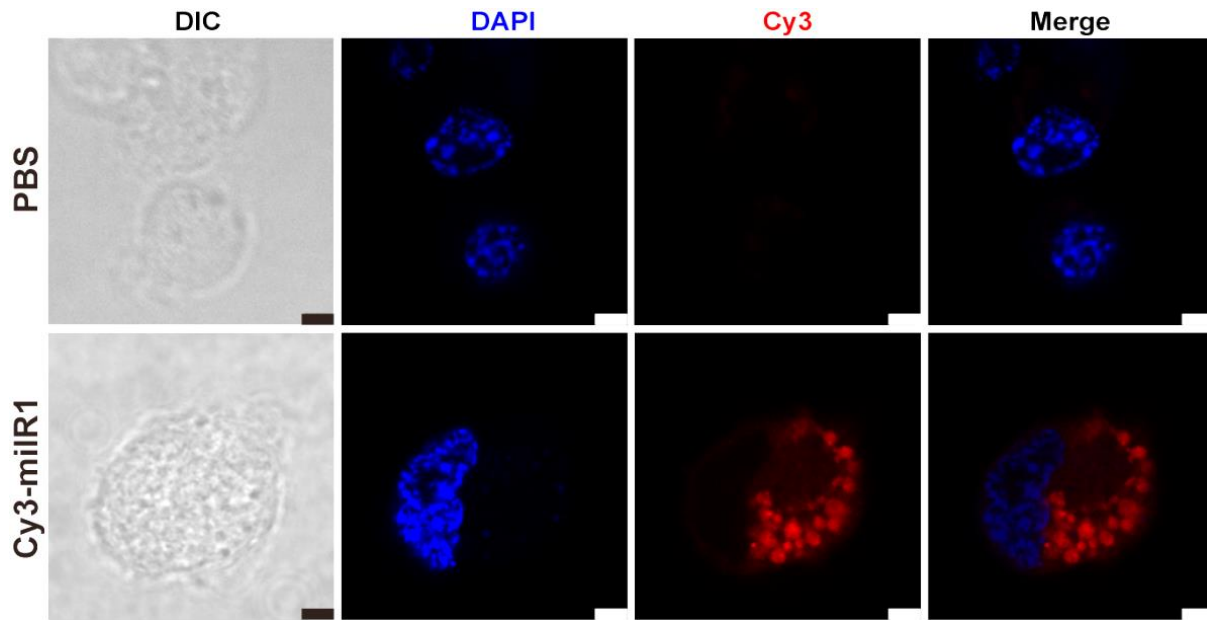

**Supplementary Figure 6**

**bba-milR1 sRNAs are translocated into cultured *Drosophila* cells via vesicles.**

bba-milR1 was translocated into *Drosophila* cells via vesicles. Cy3-labelled bba-milR1 (2  $\mu$ M) was added in *Drosophila* S2 cell cultures for 24 h, then washed with PBS, fixed in 4% paraformaldehyde and stained with DAPI. DIC, differential interference contrast microscopy; Red, Cy3; blue, DAPI. Scale bars, 3  $\mu$ m.

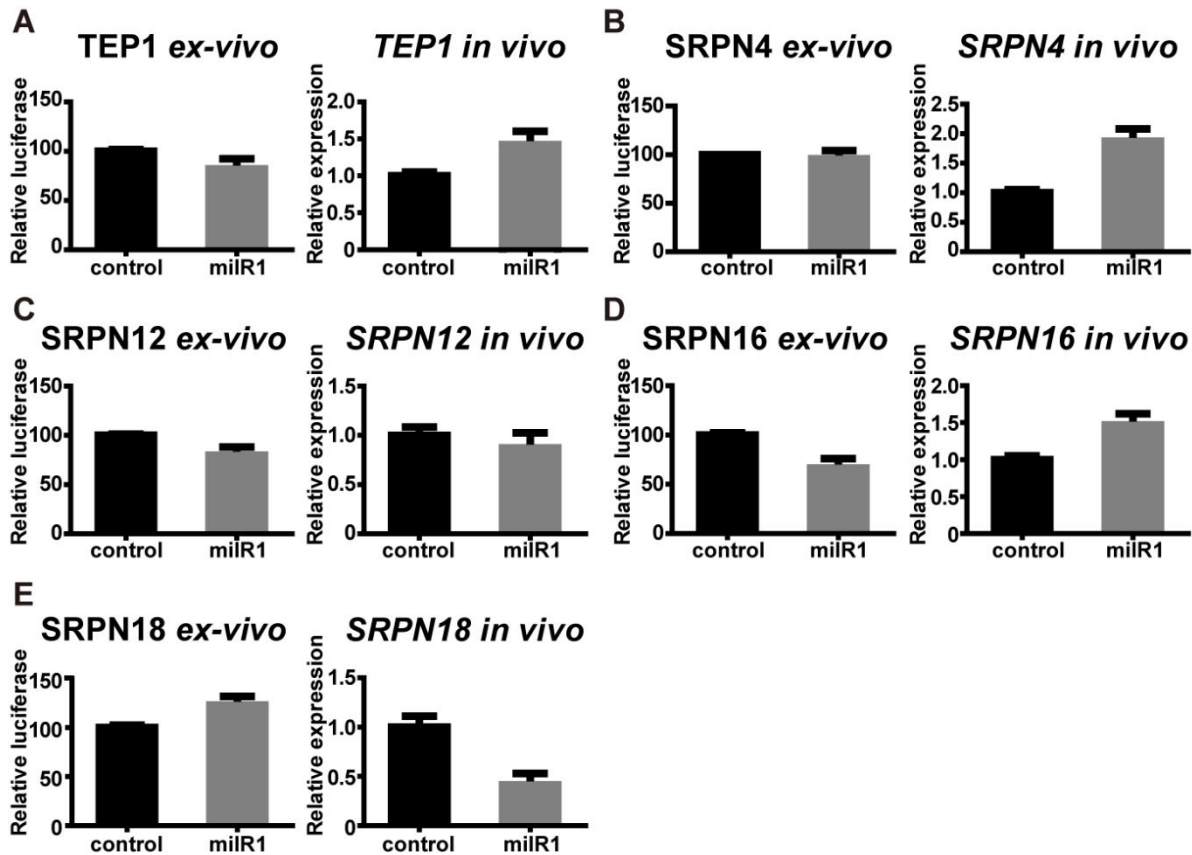

### Supplementary Figure 7

#### Verification the predicted targets of bba-miR1 *ex-vivo* and *in vivo*.

The candidate target genes were separately verified *ex-vivo* in HEK293T cells and *in vivo* in *Anopheles* mosquitoes. (a) bba-miR1 down-regulated the expression of TEP1 *ex-vivo*, but up-regulated the expression of TEP1 *in vivo*. (b) bba-miR1 down-regulated the expression of SRPN4 *ex-vivo*, but up-regulated the expression of SRPN4 *in vivo*. (c) bba-miR1 down-regulated the expression of SRPN12 *ex-vivo*, but had no effect on the expression of SRPN12 *in vivo*. (d) bba-miR1 down-regulated the expression of SRPN16 *ex-vivo*, but up-regulated the expression of SRPN16 *in vivo*. (e) Expression of SRPN18 was up-regulated *ex-vivo* but down-regulated *in vivo* by bba-miR1. The experiments were repeated three times with similar results. The expression values are normalized to control. Source data are provided as a Source Data file.

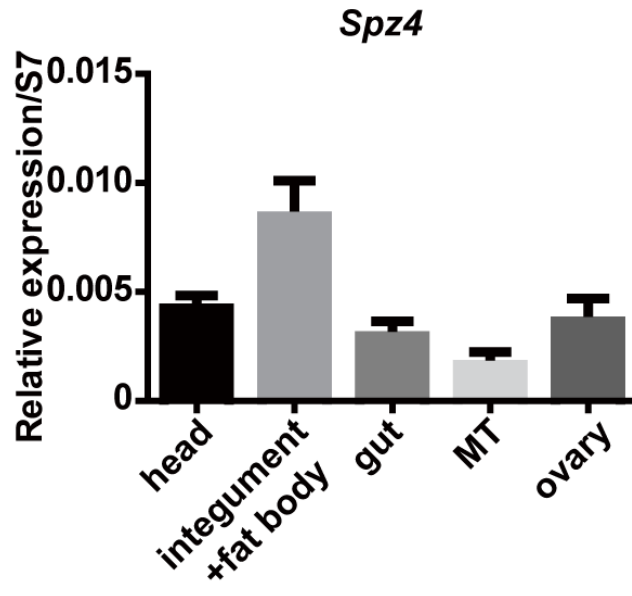

**Supplementary Figure 8**

**Expression patterns of *Spz4* in different tissues of the adult female *A. stephensi* mosquito.**

MT, Malpighian tubule. Similar results were obtained in three biological repeats. Source data are provided as a Source Data file.

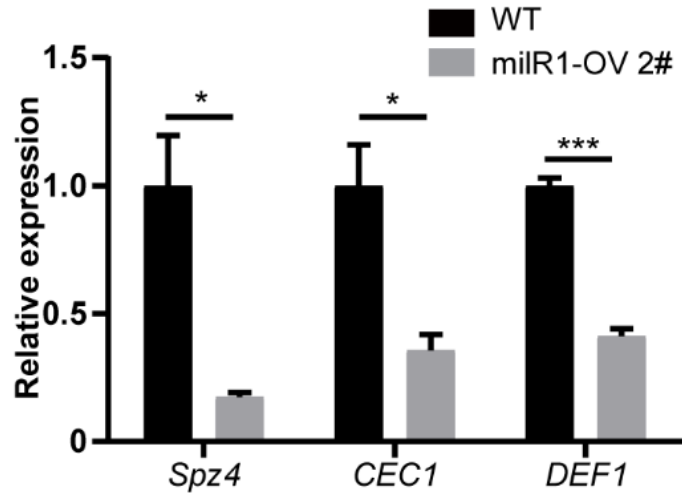

**Supplementary Figure 9**

**bba-milR1 suppresses mosquito innate immunity by down-regulating expression of *Spz4*.**

The relative transcript levels of *Spz4*, *cecropin 1 (CEC1)* and *defensin 1 (DEF1)* in mosquitoes at 48 h post infection (hpi) with WT and milR1-OV 2#. The expression values are normalized to WT. The results confirm the phenotypes shown in Fig. 4. \*  $P < 0.05$ , \*\*\*  $P < 0.001$ .  $P$  value  $< 0.05$  was regarded as statistically significant (Student's  $t$  test). Source data are provided as a Source Data file.

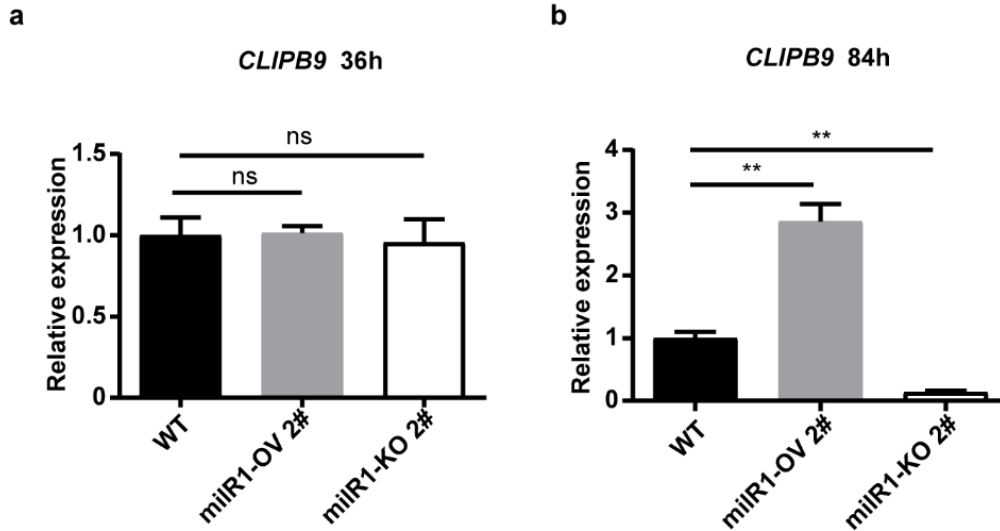

### Supplementary Figure 10

#### **Bba-milR1 up-regulates *CLIPB9* expression at the later infection stage.**

*CLIPB9* transcription levels during infection progress with WT, milR1-OV 2# and milR1-KO 2# strains. (a) The relative transcript levels of *CLIPB9* in mosquitoes at 36 h post infection with WT, milR1-OV or milR1-KO strains. There was no significant difference in *CLIPB9* expression among the groups at this time point. (b) The relative transcript levels of *CLIPB9* in mosquitoes at 84 h post infection with WT, milR1-OV 2# or milR1-KO 2# strains. The expression values are normalized to WT. The results confirm the phenotypes with the strains milR1-OV 1# and milR1-KO 1# shown in Fig. 5. \*\*  $P < 0.01$  was regarded as statistically significant (Student's *t* test).

Source data are provided as a Source Data file.

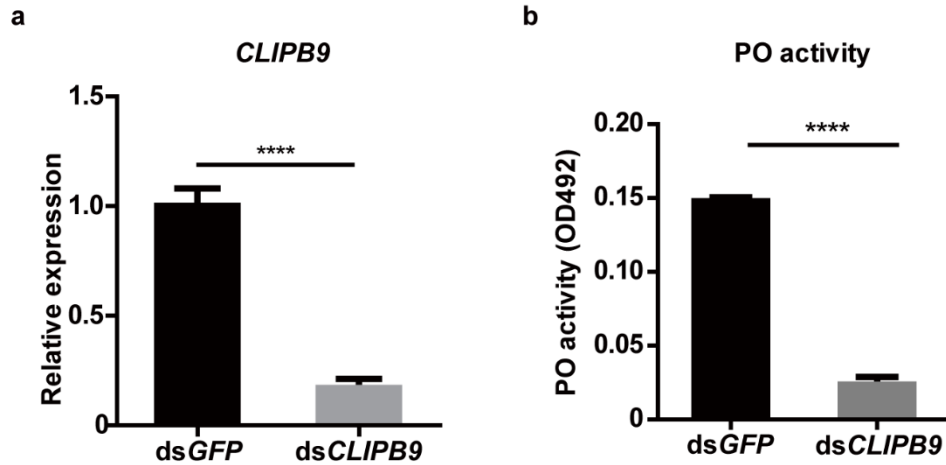

### Supplementary Figure 11

#### CLIPB9 modulates the PO activity of *A. stephensi* hemolymph.

(a) Analysis of silencing efficiency of *CLIPB9* in adult female *A. stephensi* mosquitoes. Systemic injection of *CLIPB9* dsRNA (dsCLIPB9) significantly reduced *CLIPB9* transcript levels. The expression values are normalized to dsGFP. (b) Silencing of *CLIPB9* results in significant decrease in *A. stephensi* hemolymph PO activity. Values are mean  $\pm$  s.e.m. The experiments were repeated three times with similar results. \*\*\*\* $P < 0.0001$  (Student's *t* test). Source data are provided as a Source Data file.

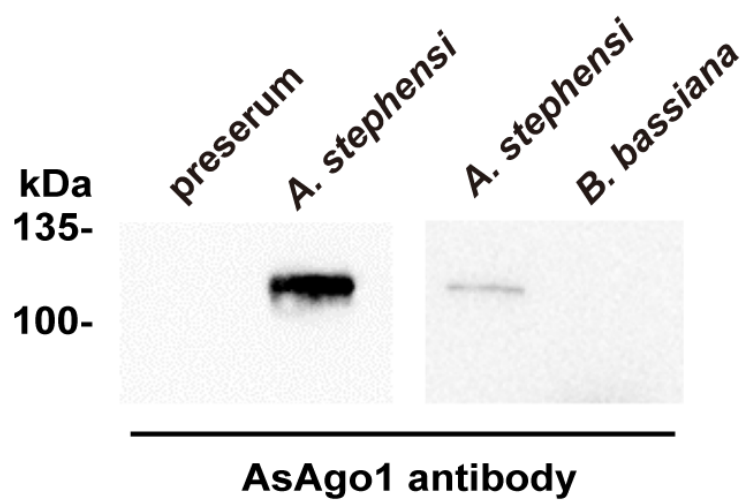

### Supplementary Figure 12

#### Specificity analysis of AsAGO1 antibody.

The protein sample of *Anopheles stephensi* and *Beauveria bassiana* were applied to western-blot analysis. AsAGO1 antibody recognizes ~110kD band in the protein sample of *A. stephensi*, but not with *B. bassiana* proteins. The preimmune serum of rabbit was used as the negative control.

Source data are provided as a Source Data file.

**Supplementary Table 1 | bba-milR1 target prediction in *Anopheles stephensi* mosquito using the multi-algorithm and multi-model strategy.**

| Gene ID    | Gene Name     | mfe               | Target Site                                                                                                                          |
|------------|---------------|-------------------|--------------------------------------------------------------------------------------------------------------------------------------|
| ASTE010227 | <i>TEP1</i>   | -16.8<br>kcal/mol | miRNA: 3' GGTCAGTTAATTGTCGGTCAGT 5'<br>                       <br>Target: 5' CGAACCTACTCAC-GCCAGTCA 3'                               |
| ASTE011729 | <i>Spz4</i>   | -22.9<br>kcal/mol | miRNA: 3' GGTCAGTTAATTGTCGGTCAGT 5'<br>                       <br>Target: 5' GCCCAGAAAGAACC GCCAGTCG 3'                              |
| ASTE002770 | <i>CLIPB9</i> | -22.8<br>kcal/mol | miRNA: 3' GGTCAGTTAATTGTCGGTCAGT 5'<br>      :       :                    <br>Target: 5' GTTGTACCGTCACCGGCCAGTCC 3'                  |
| ASTE010655 | <i>SRPN4</i>  | -22.3<br>kcal/mol | miRNA: 3' GGTCAGTTAA--TTGTCGGTCAGT 5'<br>                                           <br>Target: 5' ACAG-CAACTGCAACAGCCAGTAC 3'       |
| ASTE008874 | <i>SRPN12</i> | -24.2<br>kcal/mol | miRNA: 3' GGTCAGTTAATTGTCGGTCAGT 5'<br>:           :                                <br>Target: 5' AACACGGATGAACGCCAGTCA 3'          |
| ASTE001474 | <i>SRPN16</i> | -21.3<br>kcal/mol | miRNA: 3' GGTCAGTTAATTGTCGGTCAGT 5'<br>      :     :                                  <br>Target: 5' GCAGCCGTCTTCTCGCCAGTCA 3'       |
| ASTE001727 | <i>SRPN18</i> | -23.4<br>kcal/mol | miRNA: 3' GGTCAGTTAATTG-TCGGTCAGT 5'<br>      :                                            <br>Target: 5' CCAGACGACGCTCGAGCCAGTCG 3' |
